# Supplementary material for: Dual-recognition-based determination of ctDNA via the clamping function of peptide nucleic acid and terminal protection of small-molecule-linked DNA
Source: Royal Society of Chemistry journal article supplement (doi:10.1039/d0an01305f), 2020-01-01
Supplement: d0an01305f1.pdf [file d0an01305f1.pdf]

## Supplementary Information For

# Dual-recognition-based determination of ctDNA via the clamping function of peptide nucleic acid and terminal protection of small-molecule-linked DNA

Chaohui Chen<sup>\*a</sup>, Rongxiang He<sup>a</sup>, Zhengtao Zhang<sup>a</sup> and Yong Chen<sup>\*a,b</sup>

<sup>a</sup> Institute for Interdisciplinary Research, Jiangnan University, Wuhan 430056, P. R. China

<sup>b</sup> Département de Chimie, Ecole Normale Supérieure-PSL Research University, Paris, France

E-mail addresses: [chaohui20071220@163.com](mailto:chaohui20071220@163.com) (C. Chen)

[yong.chen@ens.fr](mailto:yong.chen@ens.fr) (Y. Chen)

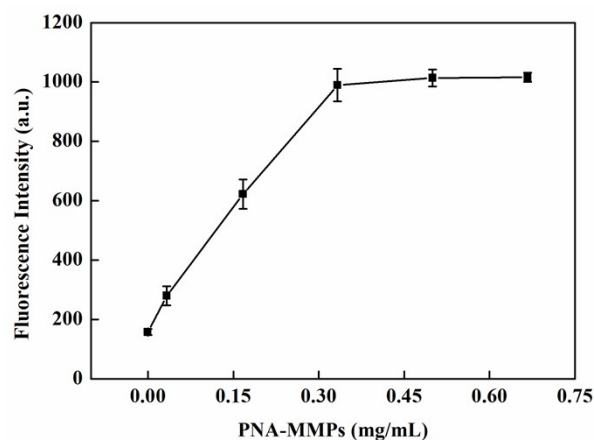

**Fig. S1.** Effect of PNA-MMPs concentration on fluorescence intensity.

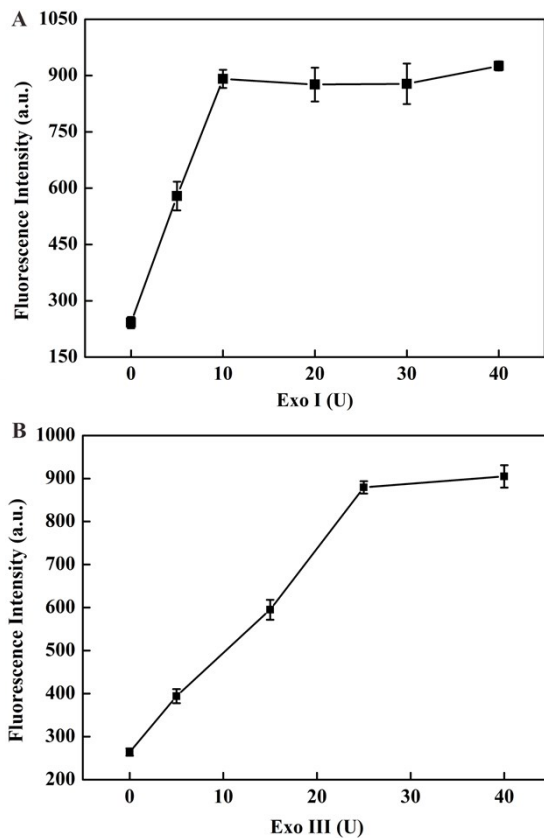

**Fig. S2.** Effect of the amounts of Exo I and Exo III (in digestion procedures) on fluorescence intensity.

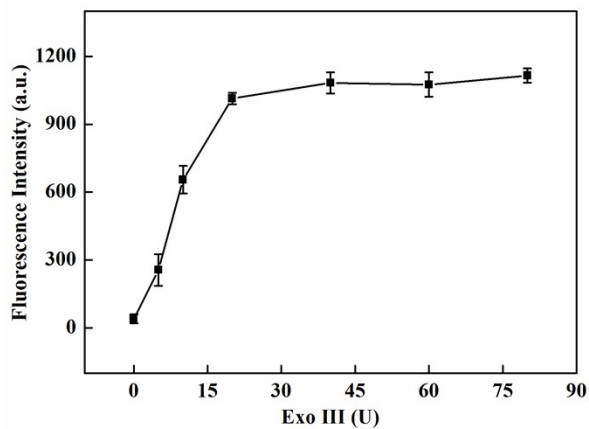

**Fig. S3.** Effect of the amount of Exo III (in signal amplification step) on fluorescence intensity.

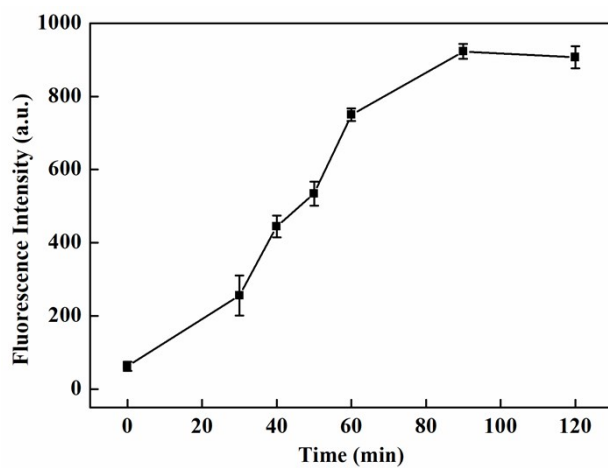

**Fig. S4.** Effect of the incubation time of Exo III (in signal amplification step) on fluorescence intensity.

**Table S1.** Determination of E542K-ds-ctDNA in normal human serum with this proposed method.

| Sample number | Added (pM) | Found (pM) | Recovery (%) | RSD (%) |
|---------------|------------|------------|--------------|---------|
| 1             | 3          | 2.776      | 92.53        | 5.16    |
| 2             | 10         | 1.037      | 103.7        | 1.84    |
| 3             | 50         | 53.25      | 106.5        | 3.23    |
| 4             | 100        | 102.8      | 102.8        | 4.67    |
